# Supplementary material
Source: Elsevier journal article supplement (https://www.sciencedirect.com/science/article/pii/S0377473220300481)
Supplement: mmc3 [file S0377473220300481:mmc3.pdf]

## Diferencias entre las bases de datos de interés criminal y las bases de datos genealógicas

|                                             | <b>Bases de datos de interés criminal (CODIS)</b>      | <b>Bases de datos de interés genealógico (GEDmatch, p.e.)</b>           |
|---------------------------------------------|--------------------------------------------------------|-------------------------------------------------------------------------|
| <b>Tipo de marcadores</b>                   | STR autosómicos, STR cromosoma Y, ADNmt                | SNP autosómicos, SNP cromosoma Y, SNP cromosoma X, ADNmt                |
| <b>Número marcadores</b>                    | 20-30                                                  | > 600 000                                                               |
| <b>Número perfiles (EE.UU.)</b>             | 18 millones                                            | 1,3 millones                                                            |
| <b>Introducción de perfiles</b>             | Laboratorios forenses acreditados                      | Cualquier persona                                                       |
| <b>Tipología racial (EE.UU.)</b>            | Mayor porcentaje de población afro-americana           | Mayor porcentaje de población blanca de origen europeo                  |
| <b>Incremento anual</b>                     | 80 000/año                                             | 150 000/año                                                             |
| <b>Cantidad ADN</b>                         | > 30 picogramos                                        | > 1 nanogramo                                                           |
| <b>Acceso público</b>                       | NO                                                     | SI                                                                      |
| <b>Fines principales</b>                    | Resolución hechos delictivos, identificación cadáveres | Genealogía recreativa, localización de familiares en personas adoptadas |
| <b>Búsqueda familiar</b>                    | Cercana (una generación)                               | Lejana (varias generaciones)                                            |
| <b>Datos biomédicos</b>                     | NO                                                     | SI                                                                      |
| <b>Datos fenotípicos (color de ojos...)</b> | NO                                                     | SI                                                                      |
| <b>Información de contacto</b>              | NO                                                     | Email                                                                   |
